# Supplementary material
Source: publisher site journal article supplement (https://www.spandidos-publications.com/8539/downloadSupplementary)
Supplement: Supplementary file 1 [file downloadSupplementary]

Table SI. Representative examples of snoRNA functions and mechanisms in human cancers.

| Cancer | snoRNAs             | Expression    | Function                                            | Mechanisms                                                                                                    | (Refs.)                                                                                                  |
|--------|---------------------|---------------|-----------------------------------------------------|---------------------------------------------------------------------------------------------------------------|----------------------------------------------------------------------------------------------------------|
| CRC    | SNORA28             | Upregulated   | Promotes proliferation and confers radioresistance. | Recruits BRD4 to increase H3K9 acetylation at the LIFR promoter and activates JAK1/STAT3 signaling.           | (64)                                                                                                     |
|        | SNORA56             | Upregulated   | Inhibits ferroptosis and promotes survival.         | Guides pseudouridylation of 28S rRNA at U1664 to facilitate GCLC translation.                                 | (65)                                                                                                     |
|        | SNORD11B            | Upregulated   | Enhances ribosome biogenesis, suppresses let-7a.    | Mediates 2'-O-methylation of 18S rRNA (G509) and MIRLET7A1HG (G225).                                          | (66)                                                                                                     |
|        | SCARNA12            | Upregulated   | Accelerates CRC progression.                        | Activates PI3K/AKT pathway.                                                                                   | (67)                                                                                                     |
|        | SNORA21             | Upregulated   | Enhances proliferation, invasion, and migration.    | Regulates Hippo and Wnt signaling pathways.                                                                   | (68)                                                                                                     |
|        | SNORA24             | Upregulated   | Promotes proliferation and xenograft tumor growth.  | Promotes G <sub>1</sub> /S phase transition and modulates p53 stability via the ubiquitin-proteasome pathway. | (69)                                                                                                     |
|        | SNORA71A            | Upregulated   | Promotes proliferation, migration, and invasion.    | Modulates NF- $\kappa$ B and Toll-like receptor pathways.                                                     | (71)                                                                                                     |
|        | SNORD12C<br>SNORD78 | Upregulated   | Promote migration and survival.                     | Mediate 2'-O-methylation of 28S rRNA and stabilize EIF4A3 and LAMC2.                                          | (72)                                                                                                     |
|        | SNORD1C             | Upregulated   | Enhances stemness and metastasis.                   | Suppression reduces $\beta$ -catenin/TCF7 expression.                                                         | (73)                                                                                                     |
|        | SNORD44             | Downregulated | Suppresses tumor progression.                       | Modulates the PI3K/Akt signaling pathway.                                                                     | (74)                                                                                                     |
|        | SNORA55             | Upregulated   | Reprograms metabolism.                              | Disrupts oxidative phosphorylation by targeting ATP synthase subunits ATP5A1 and ATP5B.                       | (81)                                                                                                     |
|        | SNORD17             | Upregulated   | Enhances growth and tumorigenicity.                 | Sequesters NPM1/MYBBP1A in nucleolus, suppressing p53 activation.                                             | (87)                                                                                                     |
|        | SNORD88B            | Upregulated   | Regulates liver CSC self-renewal.                   | Regulates Hippo signaling pathway.                                                                            | (91)                                                                                                     |
|        | HCC                 | SNORD126      | Upregulated                                         | Drives proliferation.                                                                                         | Activates PI3K/AKT/mTOR signaling via phosphorylation of AKT (Ser473), GSK-3 $\beta$ (Ser9), and p70S6K. |

|       |            |               |                                                          |                                                                                      |       |
|-------|------------|---------------|----------------------------------------------------------|--------------------------------------------------------------------------------------|-------|
|       | snoU2_19   | Upregulated   | Promotes aggressive phenotypes.                          | Relocates $\beta$ -catenin to cytoplasm, disrupting Wnt/ $\beta$ -catenin signaling. | (85)  |
|       | SNORA18L5  | Upregulated   | Facilitates proliferation.                               | Alters RPL5/RPL11 localization, promoting MDM2-mediated p53 degradation.             | (88)  |
|       | ACA11      | Upregulated   | Enhances proliferation, migration, and invasion.         | Activates PI3K/AKT signaling pathway.                                                | (84)  |
|       | SNORD76    | Upregulated   | Enhances proliferation and invasion.                     | Activates Wnt/ $\beta$ -catenin pathway.                                             | (86)  |
|       | SNORD52    | Upregulated   | Promotes tumorigenesis.                                  | Elevates and stabilizes CDK1 levels.                                                 | (90)  |
|       | SNORA42    | Upregulated   | Drives proliferation and suppresses apoptosis.           | Modulates p53 signaling and facilitates cell cycle progression.                      | (89)  |
|       | SNORA24    | Upregulated   | Promotes ribosome fidelity.                              | Guides pseudouridylates at 18S rRNA positions 609 and 863.                           | (93)  |
|       | SNORD72    | Upregulated   | Enhances proliferation, colony formation, and invasion.  | Stabilizes ID2 mRNA and counteracts lncRNA-LALR1-mediated suppression.               | (92)  |
|       | SNORA23    | Downregulated | Suppresses tumor progression.                            | Guides 2'-O-methylation of 28S rRNA (C4506) and inhibits 4EBP1 phosphorylation.      | (94)  |
|       | SNORD113-1 | Downregulated | Suppresses tumor progression.                            | Inactivates the MAPK/ERK and TGF- $\beta$ signaling pathways.                        | (101) |
| GC    | SNORA37    | Upregulated   | Promotes proliferation, invasion and metastasis.         | Interacts with CMTR1 and modulates CD44 alternative splicing.                        | (106) |
|       | SNORD105B  | Upregulated   | Enhances proliferation.                                  | Interacts with ALDOA and activates c-Myc signaling.                                  | (107) |
|       | SNORD88C   | Upregulated   | Promotes proliferation and metastasis.                   | Guides 2'-O-methylation of 28S ribosomal RNA (C3680) and enhances SCD1 translation.  | (110) |
|       | SNORA42    | Upregulated   | Regulates apoptosis.                                     | Modulates p53-dependent apoptotic mechanism.                                         | (111) |
| NSCLC | SNORA71A   | Upregulated   | Stimulates growth, invasiveness and metastasis.          | Activates MEK/ERK pathway.                                                           | (112) |
|       | SNORA38B   | Upregulated   | Promotes immunosuppression and growth.                   | Activates GAB2/AKT/mTOR pathway and recruits regulatory T cells.                     | (114) |
| BC    | SNORA71A   | Upregulated   | Facilitates proliferation, migration, invasion, and EMT. | Interacts with G3BP1, stabilizes ROCK2 and modulates TGF- $\beta$ signaling.         | (122) |

|        |            |                              |                                                  |                                                                                    |       |
|--------|------------|------------------------------|--------------------------------------------------|------------------------------------------------------------------------------------|-------|
|        | U50A       | Upregulated                  | Diminishes everolimus sensitivity.               | Downregulates c-Myc and mTOR.                                                      | (127) |
|        | SNORA68    | Upregulated                  | Enhances stemness, tumorigenesis.                | Binds to U2AF2, increases nucleolar RPL23 retention, and upregulates c-Myc.        | (123) |
|        | SNORA51    | Upregulated                  | Maintains stem cell-like properties.             | Reduces nucleolar RPL3 expression and increases c-MYC expression.                  | (124) |
|        | SNORD50A/B | Homozygous deletion (p53-WT) | Inhibits proliferation, induces apoptosis.       | Degrades p53 via TRIM21-GMPS interaction pathway.                                  | (120) |
|        | SNORA70E   | Upregulated                  | Promotes tumor progression.                      | Pseudouridylates RAP1B and regulates alternative splicing of PARPBP.               | (133) |
| OC     | SNORA72    | Upregulated                  | Enhances stemness and migration.                 | Activates Notch1/c-Myc signaling axis.                                             | (134) |
|        | SNORD89    | Upregulated                  | Promotes proliferation, invasion, migration.     | Upregulates c-Myc and Notch1 expression.                                           | (135) |
|        | SNORA73B   | Upregulated                  | Promotes proliferation, migration and invasion.  | Pseudouridylates MIB1 mRNA, activates Notch signaling and regulates RCC1 splicing. | (139) |
|        | SNORD60    | Upregulated                  | Drives tumor progression.                        | Binds fibrillarin, methylates PIK3CA mRNA and enhances PI3K/AKT/mTOR activation.   | (140) |
| EC     | SNORD89    | Upregulated                  | Inhibits apoptosis.                              | Mediates 2'-O-methylation of Bim mRNA to disrupt Bcl-2/Bax balance.                | (141) |
|        | SNORD15B   | Upregulated                  | Enhances proliferation, invasion, and migration. | Promotes TRIM25 upregulation and cytoplasmic p53 accumulation.                     | (144) |
|        | SNORD104   | Upregulated                  | Accelerates tumor growth.                        | Guides 2'-O-methylation of PARP1 mRNA.                                             | (142) |
|        | U3 snoRNA  | Upregulated                  | Promotes aerobic glycolysis, and proliferation.  | Establishes U3/ZBTB7A/HK2/LDHA axis.                                               | (145) |
| Glioma | SNORD88C   | Upregulated                  | Enhances proliferation, migration, invasion.     | Modulates DNA/RNA-related processes.                                               | (148) |
|        | SNORA71B   | Upregulated                  | Promotes proliferation, invasion, migration.     | Downregulates of mesenchymal and cell cycle markers.                               | (149) |

---

Presentation of selected representative examples of both oncogenic (upregulated) and tumor-suppressive (downregulated/deleted) snoRNAs, focusing primarily on their *in vitro* and *in vivo* mechanistic evidence.

snoRNA, small nucleolar RNA; SNORA, H/ACA box snoRNA; SNORD, C/D box snoRNA; sdrRNA, snoRNA-derived fragment; SCARNA, small Cajal body-specific RNA; CRC, colorectal cancer; HCC, hepatocellular carcinoma; GC, gastric cancer; NSCLC, non-small cell lung cancer; BC, breast cancer; OC, ovarian cancer; EC, endometrial cancer; LUAD, lung adenocarcinoma; TNBC, triple-negative breast cancer; ESCA, esophageal cancer; PDAC, pancreatic ductal adenocarcinoma; rRNA, ribosomal RNA; lncRNA, long non-coding RNA; BRD4, bromodomain-containing protein 4; LIFR, leukemia inhibitory factor receptor; STAT3, signal transducer and activator of transcription 3; GCLC, glutamate-cysteine ligase catalytic subunit; PI3K/AKT, phosphoinositide 3-kinase/protein kinase B; NF- $\kappa$ B, nuclear factor kappa-light-chain-enhancer of activated B cells; EIF4A3, eukaryotic initiation factor 4A-III; LAMC2, laminin subunit gamma 2; TCF7, transcription factor 7; ATP, adenosine triphosphate; NPM1, nucleophosmin 1; MYBBP1A, MYB binding protein 1a; MDM2, mouse double minute 2 homolog; CDK1, cyclin-dependent kinase 1; CSC, cancer stem cell; mTOR, mechanistic target of rapamycin; GSK-3 $\beta$ , glycogen synthase kinase 3 beta; p70S6K, ribosomal protein S6 kinase beta-1; ID2, inhibitor of DNA binding 2; LALR1, liver-specific abundant lncRNA 1; 4EBP1, eukaryotic translation initiation factor 4E-binding protein 1; MAPK/ERK, mitogen-activated protein kinase/extracellular signal-regulated kinase; TGF- $\beta$ , transforming growth factor- $\beta$ ; CMTR1, cap methyltransferase 1; ELAVL1, ELAV-like RNA binding protein 1; ALDOA, aldolase A; CHK1, checkpoint kinase 1; PERP, TP53 apoptosis effector; SRPK1, serine/arginine-rich protein-specific kinase 1; SCD1, stearoyl-CoA desaturase-1; GAB2, GRB2-associated binding protein 2; EMT, epithelial-mesenchymal transition; G3BP1, G3BP stress granule assembly factor 1; ROCK2, Rho-associated coiled-coil containing protein kinase 2; U2AF2, U2 small nuclear RNA auxiliary factor 2; RPL, ribosomal protein L; TRIM, tripartite motif containing; GMPS, guanosine monophosphate synthetase; RAP1B, RAP1B, member of RAS oncogene family; PARPBP, PARP1 binding protein; METTL3, methyltransferase like 3; IGF2BP2, insulin-like growth factor 2 mRNA binding protein 2; NFYA, nuclear transcription factor Y subunit alpha; MIB1, mindbomb E3 ubiquitin protein ligase 1; RCC1, regulator of chromosome condensation 1; PIK3CA, phosphatidylinositol-4,5-bisphosphate 3-kinase catalytic subunit alpha; PARP1, poly(ADP-ribose) polymerase 1; HK2, hexokinase 2; LDHA, lactate dehydrogenase A.

Table SII. snoRNAs as clinical biomarkers and therapeutic targets in human cancers.

| Cancers | snoRNA                     | Expression    | Biomarker type        | Sample type   | Clinical relevance                                                                        | (Refs.) |
|---------|----------------------------|---------------|-----------------------|---------------|-------------------------------------------------------------------------------------------|---------|
|         | SNORA28                    | Upregulated   | Prognostic            | Tissue        | High expression correlates with poor prognosis and confers radioresistance.               | (64)    |
|         | SNORA51                    | Upregulated   | Diagnostic            | Fecal samples | Potential non-invasive screening marker, especially in FIT <sup>+</sup> patients          | (76)    |
|         | SNORD1C                    | Upregulated   | Diagnostic            | Serum         | AUC=0.748 for CRC vs. controls; combined with CEA improves AUC to 0.838                   | (78)    |
| CRC     | SNORD57                    | Upregulated   | Diagnostic            | Serum         | Sensitive biomarker for early CRC detection                                               | (79)    |
|         | SNORA33                    | Upregulated   | Diagnostic            | Serum         | Levels correlate with vascular invasion; decrease after resection                         | (80)    |
|         | SNORD15B, SNORA5C          | Upregulated   | Prognostic            | Tissue        | Independent prognostic markers associated with lymphatic invasion and colon polyp history | (77)    |
|         | SNORA13                    | Upregulated   | Therapeutic           | N/A           | ASO-mediated inhibition synergizes with 5-FU, enhancing antitumor effect                  | (174)   |
|         | SNORA47                    | Upregulated   | Prognostic            | Tissue        | High expression correlates with poor OS and high recurrence rate                          | (96)    |
|         | SNORD78                    | Upregulated   | Prognostic            | Tissue        | Associated with increased tumor burden, advanced stage, and distant metastasis            | (97)    |
|         | SNORA71A                   | Downregulated | Prognostic            | Tissue        | Reduced expression predicts higher recurrence risk and reduced OS                         | (102)   |
| HCC     | SNORD113-1                 | Downregulated | Prognostic            | Tissue        | Decreased expression associated with worse survival outcomes                              | (101)   |
|         | SNORA11, SNORD124, SNORD46 | Variable      | Diagnostic/Prognostic | Tissue        | Linked to spliceosome and Notch signaling; robust diagnostic utility                      | (103)   |
|         | SNORD88B                   | Upregulated   | Therapeutic           | N/A           | ASO-mediated inhibition reduces tumor burden in PDX models                                | (91)    |

|         |                                      |                                                                                |                           |                |                                                                                            |                                                                      |
|---------|--------------------------------------|--------------------------------------------------------------------------------|---------------------------|----------------|--------------------------------------------------------------------------------------------|----------------------------------------------------------------------|
| NSCLC   | SNORA74A                             | Upregulated                                                                    | Therapeutic               | N/A            | ASO targeting SNORA74A shows significant therapeutic efficacy in preclinical models        | (172)                                                                |
|         | SNORD42B, SNORD111                   | Upregulated                                                                    | Diagnostic                | Plasma         | Early-stage detection; potential non-invasive biomarkers                                   | (115)                                                                |
|         | SNORD83A                             | Upregulated                                                                    | Diagnostic                | Plasma         | Combined with CEA enhances early-stage diagnostic capability                               | (116)                                                                |
|         | SNORA21                              | Upregulated                                                                    | Diagnostic/<br>Prognostic | Tissue         | Identified by NGS as potential biomarker for early detection and prognosis                 | (118)                                                                |
|         | SNORD60 (in LUAD)                    | Upregulated                                                                    | Diagnostic                | Tissue         | 74.2% sensitivity, 75.3% specificity for LUAD detection                                    | (117)                                                                |
|         | SNORD116, SNORA21                    | Downregulated (exosomal)                                                       | Diagnostic                | Serum exosomes | AUC=0.738 and 0.761; combined with CYFRA21-1/CEA gives AUC=0.917                           | (167)                                                                |
|         | SNORA38B                             | Upregulated                                                                    | Therapeutic               | N/A            | LNA targeting SNORA38B enhances CD8 <sup>+</sup> T-cell infiltration and sensitizes to ICB | (114)                                                                |
|         | SNORD16, SNORA73B, SCARNA4, SNORD49B | Upregulated                                                                    | Diagnostic                | Tissue/Plasma  | AUC=0.7521 for BC detection; early-stage AUC=0.7305                                        | (130)                                                                |
|         | SNORD33                              | Upregulated                                                                    | Predictive                | Plasma         | Circulating levels correlate with platinum-based chemotherapy response in TNBC             | (132)                                                                |
|         | BC                                   | 6-snoRNA signature (SNORD93, SNORA16A, SNORD113-6, SNORA7A, SNORA57, SNORA18A) | Variable                  | Prognostic     | Tissue                                                                                     | Discriminates locoregional metastasis and predicts clinical outcomes |
| SNORA38 |                                      | Upregulated                                                                    | Prognostic                | Tissue         | Associated with advanced disease, poor OS, and OCT4 expression                             | (131)                                                                |

|        |                                                                                                             |                     |            |              |                                                                         |       |
|--------|-------------------------------------------------------------------------------------------------------------|---------------------|------------|--------------|-------------------------------------------------------------------------|-------|
|        | SNORD50A/B                                                                                                  | Homozygous deletion | Prognostic | Tissue       | Deletion inhibits proliferation and induces apoptosis in p53-WT BC      | (120) |
| OC     | 9-snoRNA signature (SNORA11B, SNORA36C, SNORA58, SNORA70J, SNORA75B, SNORD105B, SNORD126, SNORD3C, SNORD89) | Variable            | Prognostic | Tissue       | Independent predictor of OC outcomes                                    | (138) |
|        | SNORA81, SNORA19, SNORA56                                                                                   | Upregulated         | Diagnostic | Tissue       | Distinguish HGSOE from serous borderline tumors and normal tissues      | (137) |
|        | SNORD89                                                                                                     | Upregulated         | Prognostic | Tissue       | Elevated in tumors with lymph node metastasis                           | (141) |
| Glioma | 7-snoRNA signature (SNORA32, SNORA36B, SCARNA15, SNORA63E, SNORA63D, SNORD88C, SNORD38A)                    | Variable            | Prognostic | Tissue       | Predicts survival in LGG patients with high sensitivity and specificity | (148) |
|        | 5-methylated-snoRNA signature (SNORA14B, SNORD113-4, SNORA71B, SNORA80B, SNORD97)                           | Variable            | Prognostic | Tissue       | Independent prognostic indicator for glioma                             | (149) |
| RCC    | SNORD15A, SNORD35B, SNORD60                                                                                 | Upregulated         | Diagnostic | Tissue/urine | AUC=0.7421 for RCC vs. controls; early-stage AUC=0.7465                 | (151) |

|      |                                                                                              |             |             |                    |                                                                                            |                                                                                                                 |       |
|------|----------------------------------------------------------------------------------------------|-------------|-------------|--------------------|--------------------------------------------------------------------------------------------|-----------------------------------------------------------------------------------------------------------------|-------|
|      | SNORD63                                                                                      | Upregulated | Diagnostic  | Urine              | AUC=0.7055                                                                                 | (152)                                                                                                           |       |
|      | SNORD96A                                                                                     | Upregulated | Diagnostic  | Plasma             | AUC=0.8909                                                                                 | (152)                                                                                                           |       |
|      | 6-snoRNA panel<br>(SNORA2,<br>SNORD116-2,<br>SNORA59B,<br>SNORD93,<br>SNORD12B,<br>SNORA70B) |             | Upregulated | Prognostic         | Tissue                                                                                     | Combined with TNM stage<br>(AUC=0.792) or Fuhrman grade<br>(AUC=0.800) outperforms clinical<br>parameters alone | (153) |
| ESCA | SNORA58,<br>SNORA68,<br>SNORD93                                                              | Upregulated | Diagnostic  | TEPs               | AUC=0.846 for ESCA; early-stage<br>AUC=0.857                                               | (160)                                                                                                           |       |
|      | SNORA80B                                                                                     | Upregulated | Therapeutic | N/A                | Inhibitor clonofibrate synergizes with<br>cisplatin to overcome chemotherapy<br>resistance | (159)                                                                                                           |       |
| PDAC | SNORA23                                                                                      | Upregulated | Therapeutic | N/A                | ASO-mediated silencing impedes<br>tumor progression in PDX models                          | (173)                                                                                                           |       |
|      | WASF2, ARF6,<br>SNORA74A,<br>SNORA25                                                         | Upregulated | Diagnostic  | Plasma<br>exosomes | AUC >0.9, surpassing CA19-9<br>(0.897); early-stage detection (stage<br>0-IIA) AUC >0.9    | (168)                                                                                                           |       |

---

snoRNA, small nucleolar RNA; SNORA, H/ACA box snoRNA; SNORD, C/D box snoRNA; FIT, fecal immunochemical test; CRC, colorectal cancer; SCARNA, small Cajal body-specific RNA; HCC, hepatocellular carcinoma; GC, gastric cancer; NSCLC, non-small cell lung cancer; BC, breast cancer; TNBC, triple-negative breast cancer; OC, ovarian cancer; HGSOC, high-grade serous ovarian carcinoma; EC, endometrial cancer; RCC, renal cell carcinoma; ESCA: esophageal cancer; PDAC, pancreatic ductal adenocarcinoma; LUAD, lung adenocarcinoma; CEA, carcinoembryonic antigen; AUC, area under the curve; ASO, antisense oligonucleotide; 5-FU, 5-fluorouracil; OS, overall survival; PDX, patient-derived xenograft; CYFRA21-1, cytokeratin 19 fragment 21-1; LNA, locked nucleic acid; NGS, next-generation sequencing; ICB, immune checkpoint blockade; TNM, tumor, node, metastasis; TEPs, tumor-educated platelets; OCT4, octamer-binding transcription factor 4; N/A, not applicable.
